# Supplementary material for: IRF1 regulates the progression of colorectal cancer via interferon-induced proteins
Source: PubMed Central journal article supplement — Int J Mol Med. 2021 Apr 15;47(6):104. doi: 10.3892/ijmm.2021.4937 (PMC8054637; doi:10.3892/ijmm.2021.4937), 2021-04-15

Figure S1. Western blotting was used to detect the expression levels of IRF1 in different colon cancer cell lines. IRF1, interferon regulatory factor 1.

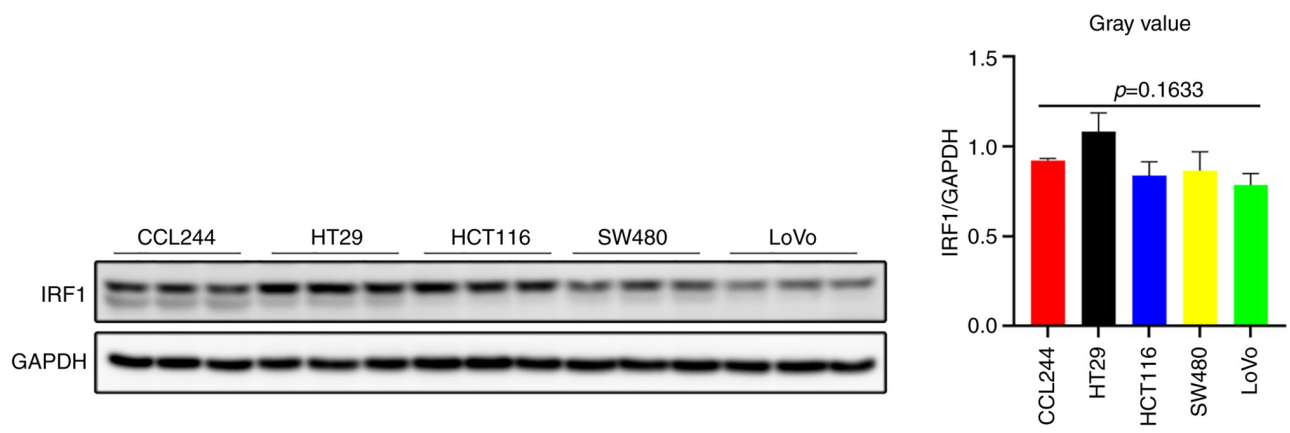

Figure S2. At 48 h after shRNA-IRF1 and shRNA-NC transfection, or Ad-IRF1 and Ad-NC infection, western blotting was used to detect the expression levels of IRF1 in colorectal cancer cells. Ad, adenovirus expression vector; IRF1, interferon regulatory factor 1; NC, negative control; shRNA, short hairpin RNA.

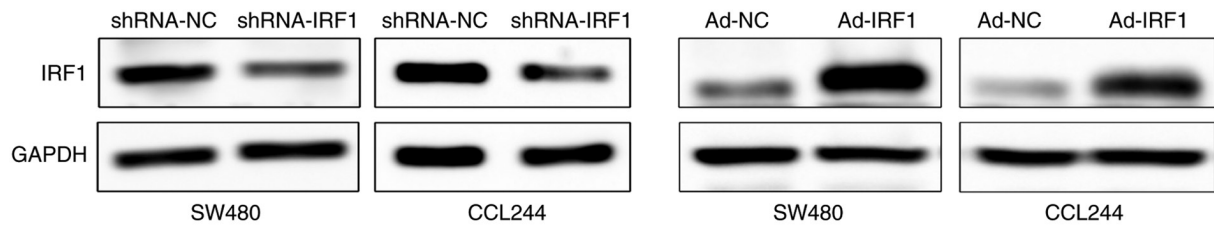

Supplement: Supplementary_Data.pdf [file Supplementary_Data.pdf]
